# Supplementary material for: CD26-Related Serum Biomarkers: sCD26 Protein, DPP4 Activity, and Anti-CD26 Isotype Levels in a Colorectal Cancer-Screening Context
Source: Hindawi journal article supplement (doi:10.1155/2020/4347936), 2020-01-21
Supplement: f1 [file 4347936.f1.pdf]

Supplementary Table 1. Correlation of DPP-IV, sCD26, IgA, IgG and IgM in women from the complete cohort.

|         | DPP4 | sCD26          | IgA    | IgG           | IgM               |
|---------|------|----------------|--------|---------------|-------------------|
| DPP4 R  | 1    | <b>0.246**</b> | 0.222  | -0.103        | 0.031             |
| p-value |      | <b>0.003</b>   | 0.129  | 0.482         | 0.833             |
| N       | 146  | <b>144</b>     | 48     | 49            | 49                |
| sCD26 R |      | 1              | -0.022 | -0.116        | 0.065             |
| p-value |      |                | 0.884  | 0.428         | 0.657             |
| N       |      | 144            | 48     | 49            | 49                |
| IgA R   |      |                | 1      | <b>0.350*</b> | 0.238             |
| p-value |      |                |        | <b>0.015</b>  | 0.103             |
| N       |      |                | 48     | <b>48</b>     | 48                |
| IgG R   |      |                |        | 1             | <b>0.692**</b>    |
| p-value |      |                |        |               | <b>&lt;0.0001</b> |
| N       |      |                |        | 49            | <b>49</b>         |
| IgM R   |      |                |        |               | 1                 |
| p-value |      |                |        |               |                   |
| N       |      |                |        |               | 49                |

R: Pearson correlation coefficient

Supplementary Table 2. Correlation of DPP-IV, sCD26, IgA, IgG and IgM in men from the complete cohort.

|         | DPP4 | sCD26 | IgA            | IgG               | IgM               |
|---------|------|-------|----------------|-------------------|-------------------|
| DPP4 R  | 1    | 0.048 | -0.067         | 0.023             | 0.028             |
| p-value |      | 0.524 | 0.567          | 0.846             | 0.812             |
| N       | 182  | 181   | 75             | 75                | 75                |
| sCD26 R |      | 1     | <b>-0.232*</b> | -0.164            | -0.058            |
| p-value |      |       | <b>0.044</b>   | 0.158             | 0.621             |
| N       |      | 189   | <b>76</b>      | 76                | 76                |
| IgA R   |      |       | 1              | <b>0.462**</b>    | <b>0.279*</b>     |
| p-value |      |       |                | <b>&lt;0.0001</b> | <b>0.015</b>      |
| N       |      |       | 76             | <b>76</b>         | <b>76</b>         |
| IgG R   |      |       |                | 1                 | <b>0.599**</b>    |
| p-value |      |       |                |                   | <b>&lt;0.0001</b> |
| N       |      |       |                | 76                | 76                |
| IgM R   |      |       |                |                   | 1                 |
| p-value |      |       |                |                   |                   |
| N       |      |       |                |                   | 76                |

R: Pearson correlation coefficient

Supplementary Table 3. Correlation of DPP-IV, sCD26, IgA, IgG and IgM in age group ≤50 years from the complete cohort.

|         | DPP4 | sCD26         | IgA    | IgG            | IgM               |
|---------|------|---------------|--------|----------------|-------------------|
| DPP4 R  | 1    | <b>0.200*</b> | 0.027  | -0.039         | -0.078            |
| p-value |      | <b>0.026</b>  | 0.850  | 0.782          | 0.577             |
| N       | 126  | <b>124</b>    | 53     | 54             | 54                |
| sCD26 R |      | 1             | -0.078 | -0.212         | 0.051             |
| p-value |      |               | 0.574  | 0.120          | 0.712             |
| N       |      | 126           | 54     | 55             | 55                |
| IgA R   |      |               | 1      | <b>0.422**</b> | <b>0.355**</b>    |
| p-value |      |               |        | <b>0.001</b>   | <b>0.008</b>      |
| N       |      |               | 54     | <b>54</b>      | <b>54</b>         |
| IgG R   |      |               |        | 1              | <b>0.660**</b>    |
| p-value |      |               |        |                | <b>&lt;0.0001</b> |
| N       |      |               |        | 55             | <b>55</b>         |
| IgM R   |      |               |        |                | 1                 |
| p-value |      |               |        |                |                   |
| N       |      |               |        |                | 55                |

R: Pearson correlation coefficient

Supplementary Table 4. Correlation of DPP-IV, sCD26, IgA, IgG and IgM in age group 51-60 years from the complete cohort.

|         | DPP4 | sCD26         | IgA    | IgG            | IgM               |
|---------|------|---------------|--------|----------------|-------------------|
| DPP4 R  | 1    | <b>0.254*</b> | -0.194 | <b>-0.347*</b> | -0.125            |
| p-value |      | <b>0.014</b>  | 0.230  | <b>0.028</b>   | 0.441             |
| N       | 95   | <b>94</b>     | 40     | <b>40</b>      | 40                |
| sCD26 R |      | 1             | -0.114 | -0.156         | 0.048             |
| p-value |      |               | 0.484  | 0.335          | 0.770             |
| N       |      | 94            | 40     | 40             | 40                |
| IgA R   |      |               | 1      | <b>0.385*</b>  | 0.311             |
| p-value |      |               |        | <b>0.014</b>   | 0.051             |
| N       |      |               | 40     | <b>40</b>      | 40                |
| IgG R   |      |               |        | 1              | <b>0.746**</b>    |
| p-value |      |               |        |                | <b>&lt;0.0001</b> |
| N       |      |               |        | 40             | <b>40</b>         |
| IgM R   |      |               |        |                | 1                 |
| p-value |      |               |        |                |                   |
| N       |      |               |        |                | 40                |

R: Pearson correlation coefficient

Supplementary Table 5. Correlation of DPP-IV, sCD26, IgA, IgG and IgM in age group ≥61 years from the complete cohort.

|         | DPP4 | sCD26 | IgA    | IgG            | IgM    |
|---------|------|-------|--------|----------------|--------|
| DPP4 R  | 1    | 0.100 | 0.148  | <b>0.386*</b>  | 0.205  |
| p-value |      | 0.490 | 0.442  | <b>0.038</b>   | 0.285  |
| N       | 50   | 50    | 29     | <b>29</b>      | 29     |
| sCD26 R |      | 1     | -0.294 | 0.098          | -0.185 |
| p-value |      |       | 0.121  | 0.612          | 0.337  |
| N       |      | 51    | 29     | 29             | 29     |
| IgA R   |      |       | 1      | <b>0.574**</b> | 0.219  |
| p-value |      |       |        | <b>0.001</b>   | 0.254  |
| N       |      |       | 29     | <b>29</b>      | 29     |
| IgG R   |      |       |        | 1              | 0.340  |
| p-value |      |       |        |                | 0.071  |
| N       |      |       |        | 29             | 29     |
| IgM R   |      |       |        |                | 1      |
| p-value |      |       |        |                |        |
| N       |      |       |        |                | 29     |

R: Pearson correlation coefficient
